# Supplementary material for: Identification of a Neutralizing Monoclonal Antibody That Recognizes a Unique Epitope on Domain III of the Envelope Protein of Tembusu Virus
Source: MDPI journal article supplement (doi:10.3390/v12060647), 2020-06-15
Supplement: s1 [file s1]

Supplementary Figure

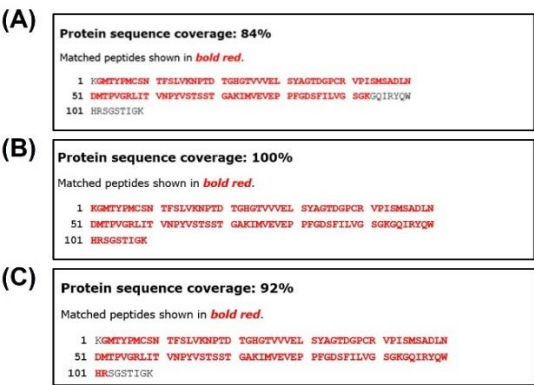

**Figure S1.** Characterization of rEDIII proteins by using mass spectrometry. (A) The 30 kDa protein. (B) The 16.7 kDa protein. (C) The 15.8 kDa protein.
